# Supplementary material for: Beyond the social gradient: the role of lifelong socioeconomic status in older adults’ health trajectories
Source: publisher site journal article supplement (doi:10.18632/aging.202342), 2020-12-21
Supplement: Supplementary file [file aging-v12i24-202342-supplementary-material-SD2.pdf]

## SUPPLEMENTARY TABLE

**Supplementary Table 1. Complete estimates of covariates in models testing associations between socioeconomic groups and speed of health change (HAT-score) over 12 Years.**

|                           | <i>β</i> (95% CI)      |                |                        |                |                        |                |                        |                 |
|---------------------------|------------------------|----------------|------------------------|----------------|------------------------|----------------|------------------------|-----------------|
|                           | Model 1 <sup>a,e</sup> |                | Model 2 <sup>b,e</sup> |                | Model 3 <sup>c,e</sup> |                | Model 4 <sup>d,e</sup> |                 |
| HAT-score at baseline     |                        |                |                        |                |                        |                |                        |                 |
| High SES                  | 0                      | Referent       | 0                      | Referent       | 0                      | Referent       | 0                      | Referent        |
| Middle SES                | -0.17 <sup>h</sup>     | (-0.30, -0.04) | -0.14 <sup>h</sup>     | (-0.27, -0.01) | -0.11 <sup>g</sup>     | (-0.24, 0.02)  | -0.13 <sup>h</sup>     | (-0.26, -0.01)  |
| Low SES                   | -0.45 <sup>i</sup>     | (-0.62, -0.29) | -0.39 <sup>i</sup>     | (-0.56, -0.23) | -0.17 <sup>g</sup>     | (-0.33, 0.00)  | -0.15 <sup>g</sup>     | (-0.31, 0.01)   |
| Mixed SES                 | -1.11 <sup>i</sup>     | (-1.41, -0.81) | -0.97 <sup>i</sup>     | (-1.27, -0.66) | -0.71 <sup>i</sup>     | (-1.02, -0.40) | -0.56 <sup>i</sup>     | (-0.87, -0.26)  |
| Slope of HAT-score        |                        |                |                        |                |                        |                |                        |                 |
| High SES                  | 0                      | Referent       | 0                      | Referent       | 0                      | Referent       | 0                      | Referent        |
| Middle SES * time         | -0.04 <sup>i</sup>     | (-0.06, -0.02) | -0.04 <sup>i</sup>     | (-0.06, -0.02) | -0.03 <sup>i</sup>     | (-0.05, -0.01) | -0.02 <sup>h</sup>     | (-0.03, -0.00)  |
| Low SES * time            | -0.08 <sup>i</sup>     | (-0.11, -0.06) | -0.08 <sup>i</sup>     | (-0.11, -0.05) | -0.06 <sup>i</sup>     | (-0.09, -0.04) | -0.06 <sup>i</sup>     | (-0.08, -0.03)  |
| Mixed SES * time          | -0.05 <sup>g</sup>     | (-0.10, 0.01)  | -0.05 <sup>g</sup>     | (-0.10, 0.01)  | -0.06 <sup>h</sup>     | (-0.11, -0.01) | -0.07 <sup>i</sup>     | (-0.11, -0.02)  |
| Time                      | -0.24 <sup>i</sup>     | (-0.30, -0.17) | -0.23 <sup>i</sup>     | (-0.30, -0.16) | -0.26 <sup>i</sup>     | (-0.33, -0.19) | -0.31 <sup>i</sup>     | (-0.38, -0.24)  |
| Sex                       |                        |                |                        |                |                        |                |                        |                 |
| Male                      | 0                      | Referent       | 0                      | Referent       | 0                      | Referent       | 0                      | Referent        |
| Female                    | -0.19 <sup>i</sup>     | (-0.30, -0.09) | -0.13 <sup>h</sup>     | (-0.24, -0.02) | -0.10 <sup>g</sup>     | (-0.21, 0.01)  | -0.08                  | (-0.19, 0.02)   |
| Age (years)               | -0.12 <sup>i</sup>     | (-0.13, -0.12) | -0.12 <sup>i</sup>     | (-0.13, -0.12) | -0.11 <sup>i</sup>     | (-0.12, -0.11) | -0.11 <sup>i</sup>     | (-0.12, -0.10)  |
| Civil status              |                        |                |                        |                |                        |                |                        |                 |
| Married                   |                        |                | 0                      | Referent       | 0                      | Referent       | 0                      | Referent        |
| Unmarried                 |                        |                | -0.43 <sup>i</sup>     | (-0.57, -0.28) | -0.30 <sup>i</sup>     | (-0.44, -0.15) | -0.24 <sup>i</sup>     | (-0.38, -0.11)  |
| Widowed/Divorced          |                        |                | -0.20 <sup>i</sup>     | (-0.31, -0.10) | -0.12 <sup>h</sup>     | (-0.22, -0.01) | -0.10 <sup>h</sup>     | (-0.20, -0.001) |
| Migrant (vs. non-migrant) |                        |                | -0.16 <sup>g</sup>     | (-0.33, 0.01)  | -0.08                  | (-0.24, 0.09)  | -0.04                  | (-0.20, 0.12)   |
| Smoking                   |                        |                |                        |                |                        |                |                        |                 |
| Never smoked              |                        |                |                        |                | 0                      | Referent       | 0                      | Referent        |
| Smoked ever               |                        |                |                        |                | -0.17 <sup>i</sup>     | (-0.28, -0.06) | -0.14 <sup>i</sup>     | (-0.24, -0.04)  |
| Current smoker            |                        |                |                        |                | -0.22 <sup>i</sup>     | (-0.37, -0.07) | -0.19 <sup>i</sup>     | (-0.33, -0.05)  |
| Alcohol use               |                        |                |                        |                |                        |                |                        |                 |
| No or occasional          |                        |                |                        |                | 0                      | Referent       | 0                      | Referent        |
| Light or moderate         |                        |                |                        |                | 0.54 <sup>i</sup>      | (0.45, 0.64)   | 0.41 <sup>i</sup>      | (0.32, 0.51)    |

|                                  |       |       |                   |                |                    |                |
|----------------------------------|-------|-------|-------------------|----------------|--------------------|----------------|
| Heavy                            |       |       | 0.60 <sup>i</sup> | (0.47, 0.73)   | 0.48 <sup>i</sup>  | (0.36, 0.60)   |
| BMI (kg/m <sup>2</sup> )         |       |       | 0.007             | (-0.005, 0.02) | -0.02 <sup>i</sup> | (-0.03, -0.01) |
| Depressive symptoms <sup>f</sup> |       |       |                   |                | -0.08 <sup>i</sup> | (-0.09, -0.07) |
| Observations                     | 6,876 | 6,853 | 6,215             |                | 5,908              |                |
| Number of individual respondents | 2,716 | 2,715 | 2,493             |                | 2,467              |                |

Abbreviations: BMI, Body Mass Index; CI, confidence interval; HAT, Health Assessment Tool; SES, socioeconomic status

<sup>a</sup>Adjusts for age and sex.

<sup>b</sup>Adjusts for age, sex, civil status (time-varying covariate), and migrant status.

<sup>c</sup>Adjusts for age, sex, civil status, migrant status, smoking, alcohol use, and BMI (civil status, smoking, alcohol use and BMI are time-varying covariates)

<sup>d</sup>Adjusts for age, sex, civil status, migrant status, smoking, alcohol use, and BMI, and depressive symptoms (civil status, smoking, alcohol use, BMI and depressive symptoms are time-varying covariates)

<sup>e</sup>All models additionally adjust for quadratic and cubic time.

<sup>f</sup>Continuous score from the Montgomery-Åsberg Depression Rating Scale ranging from 0-60 where higher scores indicate greater and more severe depressive symptoms.

<sup>g</sup> $P < 0.1$ .

<sup>h</sup> $P < 0.05$ .

<sup>i</sup> $P < 0.01$ .
